# Supplementary material for: Timing Matters: A Machine Learning Method for the Prioritization of Drug–Drug Interactions Through Signal Detection in the FDA Adverse Event Reporting System and Their Relationship with Time of Co-exposure
Source: PubMed Central journal article supplement — Drug Saf. 2024 Apr 30;47(9):895–907. doi: 10.1007/s40264-024-01430-8 (PMC11324675; doi:10.1007/s40264-024-01430-8), 2024-04-30
Supplement: 40264_2024_1430_MOESM1_ESM.pdf [file 40264_2024_1430_MOESM1_ESM.pdf]

## ***Drug Safety***

# **Timing Matters: A Machine Learning Method for the Prioritization of Drug-Drug Interactions through Signal Detection in the FDA Adverse Event Reporting System and Their Relationship with Time of Co-exposure**

Vera Battini<sup>1,2\*</sup>, Marianna Cocco<sup>1</sup>, Maria Antonietta Barbieri<sup>3</sup>, Greg Powell<sup>4</sup>, Carla Carnovale<sup>2</sup>, Emilio Clementi<sup>2,5</sup>, Andrew Bate<sup>6,7</sup>, and Maurizio Sessa<sup>1</sup>

<sup>1</sup> Department of Drug Design and Pharmacology, University of Copenhagen, Copenhagen, Denmark

<sup>2</sup> Pharmacovigilance & Clinical Research, International Centre for Pesticides and Health Risk Prevention, Department of Biomedical and Clinical Sciences (DIBIC), ASST Fatebenefratelli-Sacco University Hospital, Università degli Studi di Milano, Milan, Italy.

<sup>3</sup> Department of Clinical and Experimental Medicine, University of Messina, Messina, Italy.

<sup>4</sup> Safety Innovation and Analytics, GSK, Durham, NC, USA.

<sup>5</sup> Scientific Institute, IRCCS E. Medea, Bosisio Parini, LC, Italy.

<sup>6</sup> GSK, London, UK.

<sup>7</sup> London School of Hygiene and Tropical Medicine, University of London, London, UK.

### **Corresponding author:**

Vera Battini, MPharm, Cand. PhD

Department of Drug Design and Pharmacology,

University of Copenhagen,

Jagtvej 160, Copenhagen 2100, Capital Region, Denmark

[vera.battini@unimi.it](mailto:vera.battini@unimi.it)

# Electronic Supplementary Material 1

Developer: Sessa Maurizio

2024-03-13

```
# Load necessary libraries
library(ggplot2)

# Set seed for reproducibility
set.seed(123)

# Generate simulated data (cumulative exponential function with log2(x) rate
and a single big flex point)
time <- 1:100 # Time period

# Generate reports based on a progressively increasing rate
reports <- sapply(time, function(t) rexp(1, rate = log2(t + 1) / 1)) # Slower
increase rate based on Log2(x)/1

# Introduce the single large increase at the desired flex point (time = 5)
big_increase <- 800 # Size of the big increase
reports[5] <- reports[5] + big_increase

# Generate smaller rate of increase for the remaining days
reports[6:100] <- rep(rexp(94, rate = 0.1), each = 1)

## Warning in reports[6:100] <- rep(rexp(94, rate = 0.1), each = 1): number o
f
## items to replace is not a multiple of replacement length

# Cumulative reports
cum_reports <- cumsum(reports)

# Smooth the cumulative distribution function
smoothed_cdf <- smooth.spline(time, cum_reports)

# Calculate the derivative of the smoothed cumulative distribution function
smoothed_cdf_derivative <- diff(smoothed_cdf$y) / diff(smoothed_cdf$x)

# Find local maxima in the derivative (indicating flex points)
flex_points <- which(diff(sign(diff(smoothed_cdf_derivative))) == -2) + 1

# Plotting the cumulative distribution function with smoothing and flex point
cdf_plot <- ggplot(data.frame(time, cum_reports)) +
  geom_step(aes(x = time, y = cum_reports), direction = "hv", color = "blue")
+
  geom_line(aes(x = smoothed_cdf$x, y = smoothed_cdf$y), color = "red") +
  geom_point(data = data.frame(time = smoothed_cdf$x[flex_points], cum_report
```

```
s = smoothed_cdf$y[flex_points]), aes(x = time, y = cum_reports), color = "green", size = 3) +
  labs(x = "Co-exposure Time", y = "Cumulative Reports", title = "Smoothed Cumulative Reporting and Flex Points")
```

```
print(cdf_plot)
```

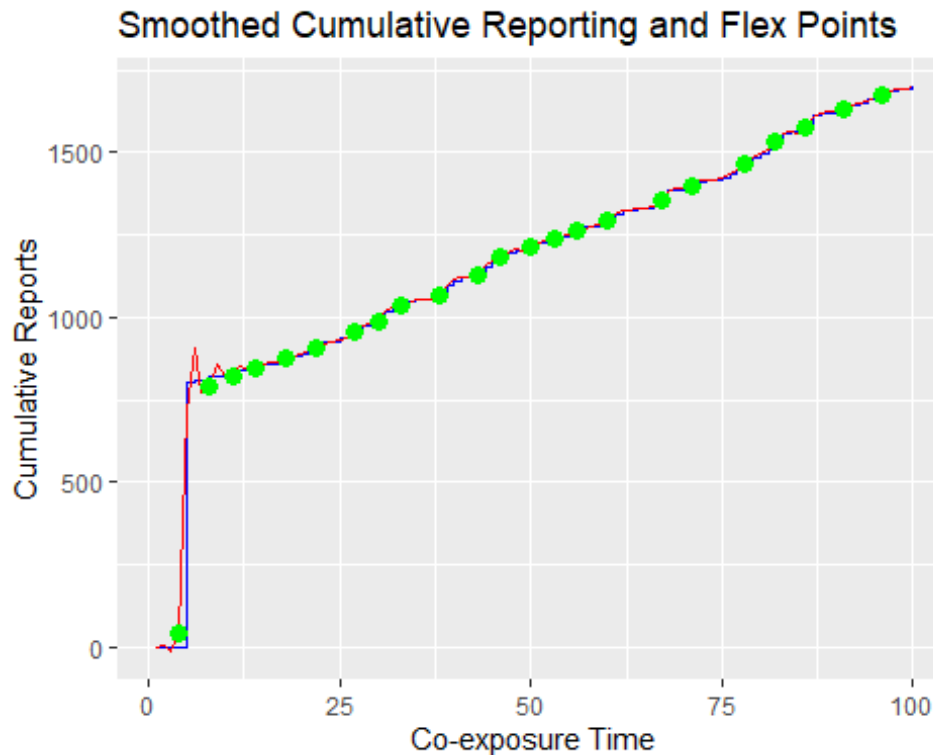

```
# Display the first flex point
if(length(flex_points) > 0) {
  print(paste("Flex point with the first increase in cumulative reports at time:", smoothed_cdf$x[flex_points[1]]))
} else {
  print("No flex points found.")
}
```

```
## [1] "Flex point with the first increase in cumulative reports at time: 4"
```
