# Supplementary material for: Timing Matters: A Machine Learning Method for the Prioritization of Drug–Drug Interactions Through Signal Detection in the FDA Adverse Event Reporting System and Their Relationship with Time of Co-exposure
Source: PubMed Central journal article supplement — Drug Saf. 2024 Apr 30;47(9):895–907. doi: 10.1007/s40264-024-01430-8 (PMC11324675; doi:10.1007/s40264-024-01430-8), 2024-04-30
Supplement: 40264_2024_1430_MOESM2_ESM.pdf [file 40264_2024_1430_MOESM2_ESM.pdf]

## *Drug Safety*

# **Timing Matters: A Machine Learning Method for the Prioritization of Drug-Drug Interactions through Signal Detection in the FDA Adverse Event Reporting System and Their Relationship with Time of Co-exposure**

Vera Battini<sup>1,2\*</sup>, Marianna Cocco<sup>1</sup>, Maria Antonietta Barbieri<sup>3</sup>, Greg Powell<sup>4</sup>, Carla Carnovale<sup>2</sup>, Emilio Clementi<sup>2,5</sup>, Andrew Bate<sup>6,7</sup>, and Maurizio Sessa<sup>1</sup>

<sup>1</sup> Department of Drug Design and Pharmacology, University of Copenhagen, Copenhagen, Denmark

<sup>2</sup> Pharmacovigilance & Clinical Research, International Centre for Pesticides and Health Risk Prevention, Department of Biomedical and Clinical Sciences (DIBIC), ASST Fatebenefratelli-Sacco University Hospital, Università degli Studi di Milano, Milan, Italy.

<sup>3</sup> Department of Clinical and Experimental Medicine, University of Messina, Messina, Italy.

<sup>4</sup> Safety Innovation and Analytics, GSK, Durham, NC, USA.

<sup>5</sup> Scientific Institute, IRCCS E. Medea, Bosisio Parini, LC, Italy.

<sup>6</sup> GSK, London, UK.

<sup>7</sup> London School of Hygiene and Tropical Medicine, University of London, London, UK.

### **Corresponding author:**

Vera Battini, MPharm, Cand. PhD

Department of Drug Design and Pharmacology,

University of Copenhagen,

Jagtvej 160, Copenhagen 2100, Capital Region, Denmark

[vera.battini@unimi.it](mailto:vera.battini@unimi.it)

**Supplementary Table S1** Temporal plausibility of disproportionality signals for DDIs considering time of co-exposure

| AE                | DDI                              | Type of interaction | Temporal Plausibility |            | Reference |
|-------------------|----------------------------------|---------------------|-----------------------|------------|-----------|
|                   |                                  |                     | Flex point (days)     | Acceptable |           |
| Bradycardia       | Digoxin<br>±<br>Bisoprolol       | PD                  | 1                     | Y          | [1]       |
| Confusional state | Amitriptyline<br>±<br>Duloxetine | Synergic Effect     | 1                     | Y          | [2]       |
| QT prolonged      | Clomipramine<br>±<br>Quetiapine  | Synergic Effect     | 1                     | ?          | [3]       |
|                   | Clomipramine<br>±<br>Venlafaxine | Synergic Effect     | 1                     | ?          | [3]       |
| Haemorrhage       | Enoxaparin<br>±<br>Ticagrelor    | Synergic Effect     | 1                     | Y          | [4–6]     |
|                   | Ticagrelor<br>±<br>Heparin       | Synergic Effect     | 1                     | Y          | [4,5]     |
|                   | Enoxaparin<br>±<br>Clopidogrel   | Synergic Effect     | 1                     | Y          | [6]       |
|                   | Apixaban<br>±<br>Ticagrelor      | Synergic Effect     | 1                     | Y          | [7]       |
|                   | Apixaban<br>±<br>Prasugrel       | Synergic Effect     | 1                     | Y          | [7]       |
|                   | Fondaparinux<br>±<br>Ticagrelor  | Synergic Effect     | 1                     | Y          | [8]       |
|                   | Fondaparinux<br>±<br>Clopidogrel | Synergic Effect     | 1                     | Y          | [8]       |
|                   | Alteplase<br>±<br>Heparin        | Synergic Effect     | 1                     | ?          | [9–11]    |
|                   | Warfarin<br>±<br>Clopidogrel     | Synergic Effect     | 1                     | ?          | [12–14]   |
|                   | Warfarin<br>±<br>Rivaroxaban     | Synergic Effect     | 1                     | Y          | [15,16]   |
|                   | Ibuprofen<br>±<br>Clopidogrel    | Synergic Effect     | 1                     | Y          | [17]      |
| Hyperkalaemia     | Trimethoprim<br>±<br>Lisinopril  | Synergic Effect     | 1                     | ?          | [18,19]   |
|                   | Enalapril<br>±<br>Trimethoprim   | Synergic Effect     | 3                     | ?          | [18,19]   |
| Hyponatraemia     | Duloxetine<br>±<br>Escitalopram  | Synergic Effect     | 1                     | Y          | [20,21]   |

|             |                                   |                 |     |   |         |
|-------------|-----------------------------------|-----------------|-----|---|---------|
| Hypotension | Lercanidipine<br>±<br>Propranolol | Synergic Effect | 1   | Y | [22]    |
|             | Irbesartan<br>±<br>Perindopril    | PD              | 1   | Y | [23,24] |
|             | Ramipril<br>±<br>Losartan         | PD              | 24  | ? | [23,24] |
|             | Sildenafil<br>±<br>Furosemide     | Synergic Effect | 7   | Y | [25]    |
|             | Amitriptyline<br>±<br>Propranolol | Synergic Effect | 1   | Y | [26]    |
|             | Nebivolol<br>±<br>Doxazosin       | Synergic Effect | 1   | Y | [27]    |
|             | Bisoprolol<br>±<br>Alfuzosin      | Synergic Effect | 1   | Y | [27]    |
|             | Bisoprolol<br>±<br>Doxazosin      | Synergic Effect | 1   | Y | [27]    |
|             | Nebivolol<br>±<br>Tamsulosin      | Synergic Effect | 108 | ? | [27]    |

? = it is not possible to define if it is temporally plausible

AE: Adverse Event; DDI: Drug-Drug interaction; PD: Pharmacodynamic interaction; Y: Yes.

## References

1. LeWinter MM, Crawford MH, O'Rourke RA, Karliner JS. The effects of oral propranolol, digoxin and combination therapy on the resting and exercise electrocardiogram. *Am Heart J.* 1977;93:202–9.
2. Boyer EW, Shannon M. The Serotonin Syndrome. *New England Journal of Medicine* [Internet]. 2005 [cited 2023 Aug 12];352:1112–20. Available from: <https://doi.org/10.1056/NEJMra041867>
3. Sala M, Vicentini A, Brambilla P, Montomoli C, Jogia JR, Caverzasi E, et al. QT interval prolongation related to psychoactive drug treatment: a comparison of monotherapy versus polytherapy. *Ann Gen Psychiatry.* 2005;4:1.
4. Park D-W, Kwon O, Jang J-S, Yun S-C, Park H, Kang D-Y, et al. Clinically Significant Bleeding With Ticagrelor Versus Clopidogrel in Korean Patients With Acute Coronary Syndromes Intended for Invasive Management: A Randomized Clinical Trial. *Circulation.* 2019;140:1865–77.
5. Wallentin L, Becker RC, Budaj A, Cannon CP, Emanuelsson H, Held C, et al. Ticagrelor versus clopidogrel in patients with acute coronary syndromes. *N Engl J Med.* 2009;361:1045–57.
6. Gerlach AT, Pickworth KK, Seth SK, Tanna SB, Barnes JF. Enoxaparin and bleeding complications: a review in patients with and without renal insufficiency. *Pharmacotherapy.* 2000;20:771–5.
7. Pfizer. Eliquis, Monograph. 2015.
8. Mylan Institutional LLC. Arixtra (Fondaparinux). 2020.
9. Powers WJ, Rabinstein AA, Ackerson T, Adeoye OM, Bambakidis NC, Becker K, et al. Guidelines for the Early Management of Patients With Acute Ischemic Stroke: 2019 Update to the 2018 Guidelines for the Early Management of Acute Ischemic Stroke: A Guideline for Healthcare Professionals From the American Heart Association/American Stroke Association. *Stroke.* 2019;50:e344–418.
10. Kam W, Holmes DN, Hernandez AF, Saver JL, Fonarow GC, Smith EE, et al. Association of Recent Use of Non-Vitamin K Antagonist Oral Anticoagulants With Intracranial Hemorrhage Among Patients With Acute Ischemic Stroke Treated With Alteplase. *JAMA.* 2022;327:760–71.
11. Shahjouei S, Tsivgoulis G, Goyal N, Sadighi A, Mowla A, Wang M, et al. Safety of Intravenous Thrombolysis Among Patients Taking Direct Oral Anticoagulants: A Systematic Review and Meta-Analysis. *Stroke.* 2020;51:533–41.
12. Gomes T, Mamdani MM, Holbrook AM, Paterson JM, Hellings C, Juurlink DN. Rates of hemorrhage during warfarin therapy for atrial fibrillation. *CMAJ.* 2013;185:E121-127.
13. Ozturk M, Ipekci A, Kiyak SK, Akdeniz YS, Aydin Y, Ikizceli I, et al. Bleeding Complications in Warfarin-Treated Patients Admitted to the Emergency Department. *J Clin Med Res.* 2019;11:106–13.
14. Lidell C, Svedberg L-E, Lindell P, Bandh S, Job B, Wallentin L. Clopidogrel and warfarin: absence of interaction in patients receiving long-term anticoagulant therapy for non-valvular atrial fibrillation. *Thromb Haemost.* 2003;89:842–6.
15. Kearon C, Akl EA, Ornelas J, Blaivas A, Jimenez D, Bounameaux H, et al. Antithrombotic Therapy for VTE Disease: CHEST Guideline and Expert Panel Report. *Chest.* 2016;149:315–52.
16. Ageno W, Gallus AS, Wittkowsky A, Crowther M, Hylek EM, Palareti G. Oral anticoagulant therapy: Antithrombotic Therapy and Prevention of Thrombosis, 9th ed: American College of Chest Physicians Evidence-Based Clinical Practice Guidelines. *Chest.* 2012;141:e44S-e88S.
17. Schjerning Olsen A-M, Gislason GH, McGettigan P, Fosbøl E, Sørensen R, Hansen ML, et al. Association of NSAID use with risk of bleeding and cardiovascular events in patients receiving antithrombotic therapy after myocardial infarction. *JAMA.* 2015;313:805–14.
18. Fralick M, Macdonald EM, Gomes T, Antoniou T, Hollands S, Mamdani MM, et al. Co-trimoxazole and sudden death in patients receiving inhibitors of renin-angiotensin system: population based study. *BMJ.* 2014;349:g6196.

19. Crellin E, Mansfield KE, Leyrat C, Nitsch D, Douglas IJ, Root A, et al. Trimethoprim use for urinary tract infection and risk of adverse outcomes in older patients: cohort study. *BMJ*. 2018;360:k341.
20. Mannheimer B, Falhammar H, Calissendorff J, Skov J, Lindh JD. Time-dependent association between selective serotonin reuptake inhibitors and hospitalization due to hyponatremia. *J Psychopharmacol*. 2021;35:928–33.
21. Raj R, Jacob A, Venkatanarayan A, Doraiswamy M, Ashok M. Severe Symptomatic Hyponatremia Secondary to Escitalopram-Induced SIADH: A Case Report with Literature Review. *Case Rep Nephrol*. 2018;2018:3697120.
22. Leon MB, Rosing DR, Bonow RO, Epstein SE. Combination therapy with calcium-channel blockers and beta blockers for chronic stable angina pectoris. *Am J Cardiol*. 1985;55:69B-80B.
23. PRAC recommends against combined use of medicines affecting the renin-angiotensin (RAS) system.
24. Fried LF, Emanuele N, Zhang JH, Brophy M, Conner TA, Duckworth W, et al. Combined angiotensin inhibition for the treatment of diabetic nephropathy. *N Engl J Med*. 2013;369:1892–903.
25. Rosenkranz S, Erdmann E. [Interaction between sildenafil and antihypertensive drugs: what is evidence-based?]. *Dtsch Med Wochenschr*. 2001;126:1144–9.
26. Kadioglu SB, Celik T. Orthostatic Hypotension and Drugs: Drug-Induced Orthostatic Hypotension. *Orthostatic Hypotension in Older Adults*. 2021;45–59.
27. Oelke M, Gericke A, Michel MC. Cardiovascular and ocular safety of  $\alpha 1$ -adrenoceptor antagonists in the treatment of male lower urinary tract symptoms. *Expert Opin Drug Saf*. 2014;13:1187–97.

**Supplementary Table S2** Plausible confounders related with the time of co-exposure

| <b>AE</b>         | <b>DDI</b>                           | <b>Confounders</b>   | <b>AEs of interest</b> | <b>Every other AEs</b> | <b>P</b>     |
|-------------------|--------------------------------------|----------------------|------------------------|------------------------|--------------|
| Bradycardia       | Digoxin                              | Apixaban             | 0                      | 12                     | 0.025        |
|                   | ±                                    | Atorvastatin         | 0                      | 14                     | 0.013        |
|                   | Bisoprolol                           | Sacubitril/Valsartan | 0                      | 12                     | 0.025        |
| Confusional state | Amitriptyline                        | <b>Clonazepam</b>    | 10                     | 1                      | <b>0.001</b> |
|                   | ±                                    | Pregabalin           | 0                      | 15                     | 0.113        |
|                   | Duloxetine                           | Mean age             | 48.2                   | 48.3                   | 0.985        |
| Haemorrhage       | Enoxaparin                           | -                    | -                      | -                      | -            |
|                   | ±                                    |                      |                        |                        |              |
|                   | Ticagrelor                           |                      |                        |                        |              |
|                   | ±                                    |                      |                        |                        |              |
|                   | Heparin                              |                      |                        |                        |              |
|                   | Enoxaparin                           | Lorazepam            | 0                      | 25                     | 0.001        |
|                   | ±                                    | Mean age             | 73.8                   | 71.9                   | 0.161        |
|                   | Clopidogrel                          |                      |                        |                        |              |
|                   | Apixaban                             | -                    | -                      | -                      | -            |
|                   | ±                                    |                      |                        |                        |              |
|                   | Ticagrelor                           |                      |                        |                        |              |
|                   | Apixaban                             | -                    | -                      | -                      | -            |
|                   | ±                                    |                      |                        |                        |              |
| Prasugrel         |                                      |                      |                        |                        |              |
| Fondaparinux      | Acute coronary syndrome              | 14                   | 2                      | 0.264                  |              |
| ±                 | Acute left ventricular failure       | 9                    | 0                      | 0.126                  |              |
| Ticagrelor        | Analgesic therapy                    | 9                    | 0                      | 0.126                  |              |
|                   | Angina pectoris                      | 24                   | 9                      | 0.810                  |              |
|                   | Cerebrovascular accident prophylaxis | 9                    | 0                      | 0.126                  |              |
|                   | Chest pain                           | 4                    | 0                      | 0.543                  |              |
|                   | Off label use                        | 2                    | 0                      | 1.000                  |              |
|                   | Thrombosis prophylaxis               | 1                    | 3                      | 0.068                  |              |
|                   | <b>Acetylsalicylic Acid</b>          | 24                   | 2                      | <b>0.002</b>           |              |
|                   | Ramipril                             | 2                    | 0                      | 1.000                  |              |
| Fondaparinux      | -                                    | -                    | -                      | -                      |              |
| ±                 |                                      |                      |                        |                        |              |
| Clopidogrel       |                                      |                      |                        |                        |              |
| Warfarin          | Carvedilol                           | 0                    | 5                      | 0.012                  |              |
| ±                 | Metoprolol                           | 4                    | 1                      | 0.715                  |              |
| Rivaroxaban       | Female                               | 18                   | 17                     | 0.117                  |              |

|                                 |                                   |                       |       |              |              |
|---------------------------------|-----------------------------------|-----------------------|-------|--------------|--------------|
|                                 | Ibuprofen<br>±<br>Clopidogrel     | Furosemide            | 0     | 2            | 0.668        |
| Hyponatraemia                   | Duloxetine<br>±<br>Escitalopram   | Female                | 0     | 6            | 0.084        |
| Hypotension                     | Lercanidipine<br>±<br>Propranolol | -                     | -     | -            | -            |
|                                 | Irbesartan<br>±<br>Perindopril    | -                     | -     | -            | -            |
|                                 | Sildenafil<br>±<br>Furosemide     | -                     | -     | -            | -            |
|                                 | Amitriptyline<br>±<br>Propranolol | Acetaminophen/Codeine | 0     | 6            | 0.208        |
|                                 |                                   | Calcium Carbonate     | 0     | 6            | 0.208        |
|                                 |                                   | Lansoprazole          | 1     | 3            | 1.000        |
|                                 |                                   | Tramadol              | 3     | 1            | 0.140        |
|                                 | Nebivolol<br>±<br>Doxazosin       | Ramipril              | 0     | 2            | 0.292        |
|                                 |                                   | Female                | 6     | 4            | 1.000        |
|                                 | Bisoprolol<br>±<br>Alfuzosin      | Apixaban              | 0     | 10           | 0.006        |
| <b>Carbidopa/Levodopa</b>       |                                   | 4                     | 0     | <b>0.041</b> |              |
| Cefuroxime                      |                                   | 0                     | 10    | 0.005        |              |
| <b>Dutasteride</b>              |                                   | 4                     | 0     | <b>0.041</b> |              |
| Ezetimibe                       |                                   | 0                     | 10    | 0.005        |              |
| Furosemide                      |                                   | 0                     | 2     | 0.642        |              |
| Glyburide/Metformin             |                                   | 0                     | 2     | 0.642        |              |
| Hydrochlorothiazide /Olmesartan | 0                                 | 2                     | 0.642 |              |              |
| Bisoprolol<br>±<br>Doxazosin    | Acetylsalicylic Acid              | 0                     | 8     | 0.068        |              |
|                                 | Cefalexin                         | 0                     | 7     | 0.099        |              |
|                                 | Naproxen                          | 0                     | 7     | 0.099        |              |
|                                 | Warfarin                          | 0                     | 12    | 0.014        |              |
|                                 | <b>Mean Age</b>                   |                       | 54.7  | 66.5         | <b>0.011</b> |

Significant concomitant factors in bold for the AE of interest.  
AE: Adverse Event; DDI: Drug-Drug interaction

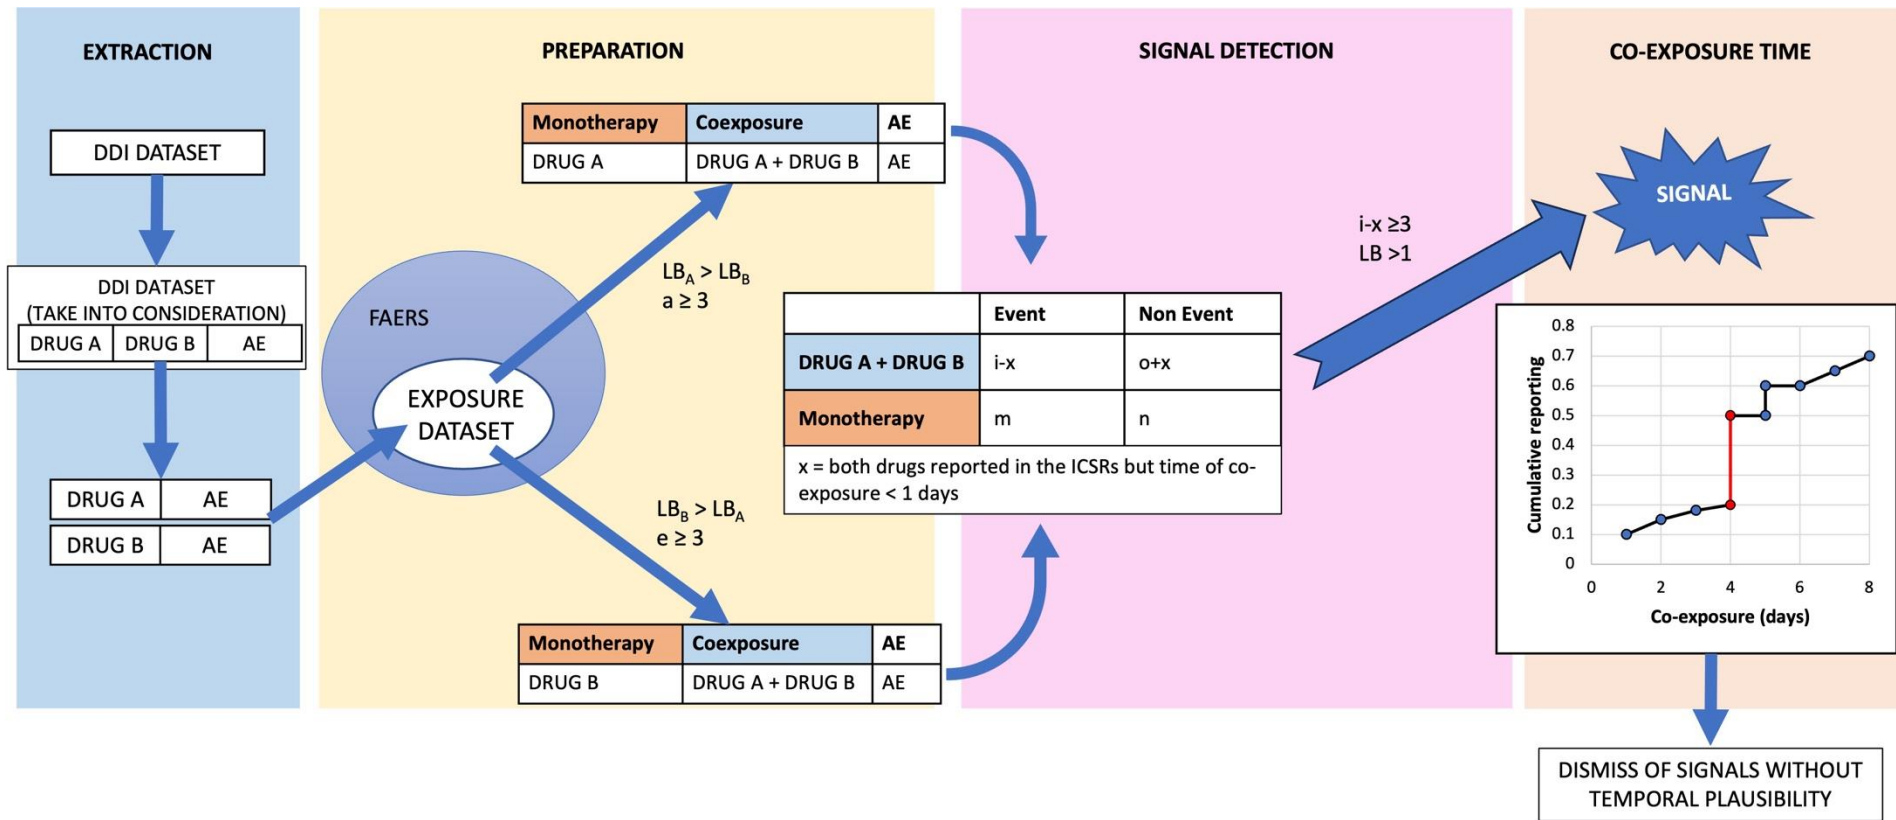

**Fig. S1** Description of the process  
*AE Adverse event, DDI Drug-drug interaction, FAERS Food and Drug Administration Adverse Event Reporting System, LB lower bound*



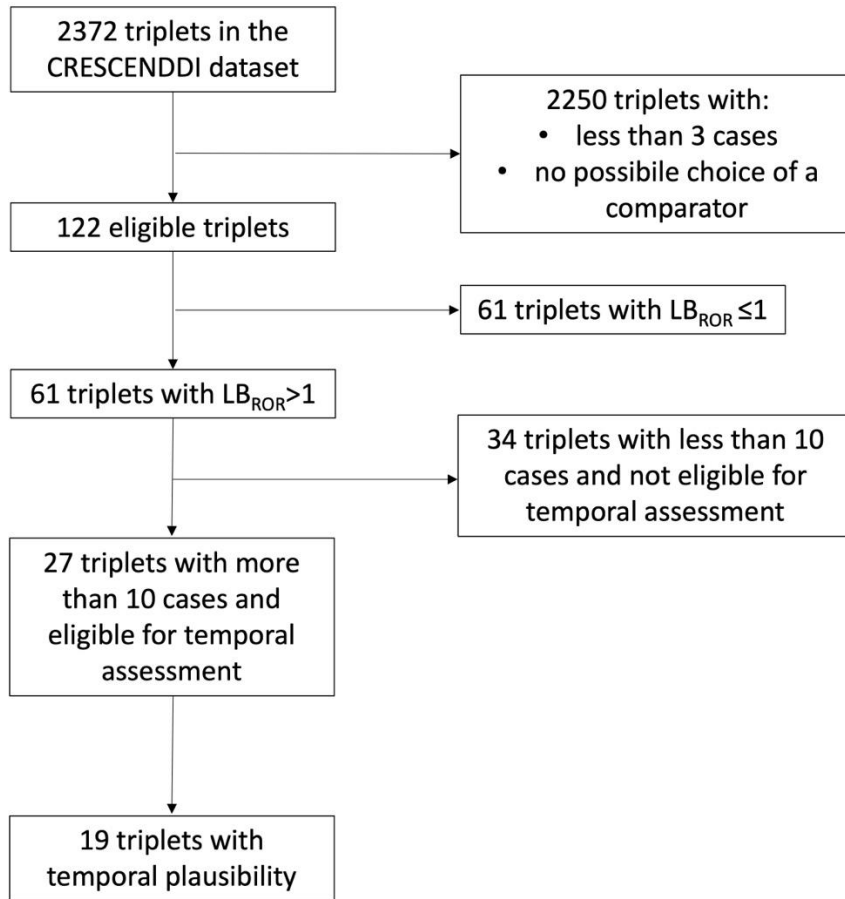

**Fig. S2** Flow chart depicting the prioritization method for temporal plausibility assessment of disproportionality signals for DDIs  
*LB lower bound, ROR reporting Odds Ratio*
